# Supplementary material for: Electrochemical Synthesis of 4-Sulfenylisocoumarins via Radical Cascade Annulation of o- Alkynylbenzoates with Thiophenols
Source: Research Square preprint supplement (doi:10.21203/rs.3.rs-7188600/v1), 2025-07-30
Supplement: Supplementary file 1 [file 0359e751dfc5e9dbaf15b7e5.docx]

***Supplementary Information***

**Synthesis of 4-Sulfenylisocoumarins via Radical Cascade Annulation of o-Alkynylbenzoates with Thiophenols**

Chao Ma,a Xiaoling Xu,a Xiang Luo,a Ruijuan Lu,a Hualiang Shen,ab Guoqi Yu,b and Tao Cai,*ab

a.College of Chemistry and Chemical Engineering, Shaoxing University, Shaoxing, 312000, China.

b.Zhejiang Engineering Research Center of Fat-Soluble Vitamin, Shaoxing University, 312000, China.

E-mail: [yuguoqi@usx.edu.cn](mailto:yuguoqi@usx.edu.cn); [cait361@usx.edu.cn](mailto:cait361@usx.edu.cn)

**Contents**

[**I General Information 2**](#_Toc201071984)

[**II General Procedure for the Electrochemical Synthesis of 4-Sulfenylisocoumarins 2**](#_Toc201071985)

[**III Cyclic Voltammograms Experiments 3**](#_Toc201071986)

[**IV Radical trapping experiment 3**](#_Toc201071987)

[**V Gram-scale synthesis and synthetic transformation 5**](#_Toc201071988)

[**VI Spectra Data of Products 5**](#_Toc201071989)

[**VII References 14**](#_Toc201071990)

[**VIII The 1H-, 13C{1H}-, 19F{1H} Spectra of Products 16**](#_Toc201071991)

# I General Information

All reactions were carried out under an air atmosphere. 1H NMR (400 MHz), 19F NMR (376 MHz) and 13C NMR (101 MHz) spectra were measured on Bruker AVⅢ 400M and 500M spectrometers with CDCl3 as solvent and tetramethylsilane (TMS) as internal standard. Chemical shifts were reported in units (ppm) by assigning TMS resonance in the 1H spectrum as 0.00 ppm and CDCl3 resonance in the 13C spectrum as 77.16 ppm. All coupling constants (*J* values) were reported in Hertz (Hz). Column chromatography was performed on silica gel 300-400 mesh. Unless otherwise noted, all reagents, solvents and materials were commercially available and used without any further purification unless specified. The staring materials **1a-1u** were synthesized following the known procedures.[S1] Thiophenols were purchased from Macklin, Sigma-Aldrich, or TCI and used without further purification.

# II General Procedure for the Electrochemical Synthesis of 4-Sulfenylisocoumarins

A 25 mL three-necked flask-type cell was charged with *o*-alkynylbenzoate **1** (0.2 mmol, 1.0 equiv), thiophenols **2** (0.8 mmol, 4.0 equiv), and Bu4NBF4(0.4 mmol, 2.0 equiv). The cell was equipped with a platinum plate (1.0 cm x 1.0 cm x 0.1 mm) anode and a C200 plate (1.2 cm x 1.0 cm x 6.5 mm) cathode (Figure S1). Then mixture of CH3CN-HFIP (6 mL, v/v=10:1) was added and the electrolysis was carried out at room temperature using a constant current of 10 mA for 10 hours. Upon completion, the reaction mixture was concentrated and purified by silica gel column chromatography using petroleum ether/EA (*v*/*v*=20:1) as the eluent to give the corresponding products.


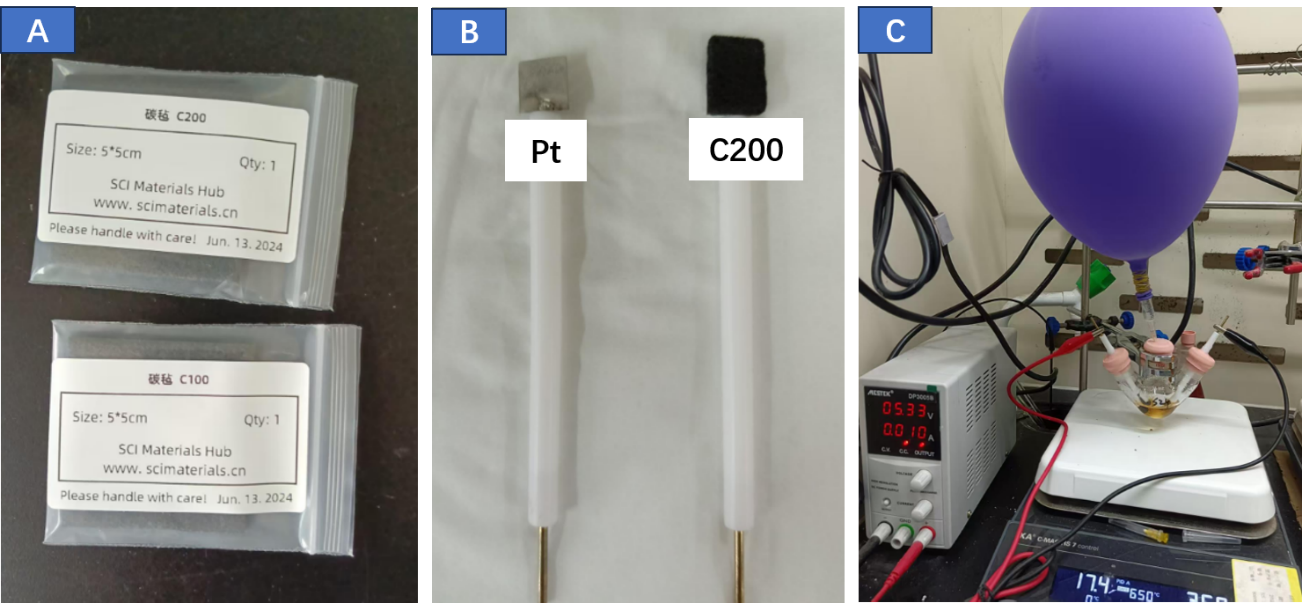


Figure **S1**. The electrolysis setup

# III Cyclic Voltammograms Experiments

Cyclic voltammetry was performed in a three-electrode cell connected to a schlenk line at room temperature. The working electrode was a platinum disk electrode, and the counter electrode a platinum wire. The reference was an Ag/AgCl electrode submerged in a saturated aqueous KCl solution. In all experiments, 10 mL of CH3CN-HFIP containing 0.076 M nBu4NBF4 was poured into the electrochemical cell. The scan rate is 0.05 V/s, ranging from 0 V to 2.5 V. The peak potentials vs. Ag/AgCl for use. The oxidation peak of methyl 2-(phenylethynyl)benzoate **1a** was observed at 2.05 V (red line), and the oxidation peaks of 4-methoxybenzenethiol **2b** were 1.26 V and 1.97 V (green line), respectively (Figure S2).


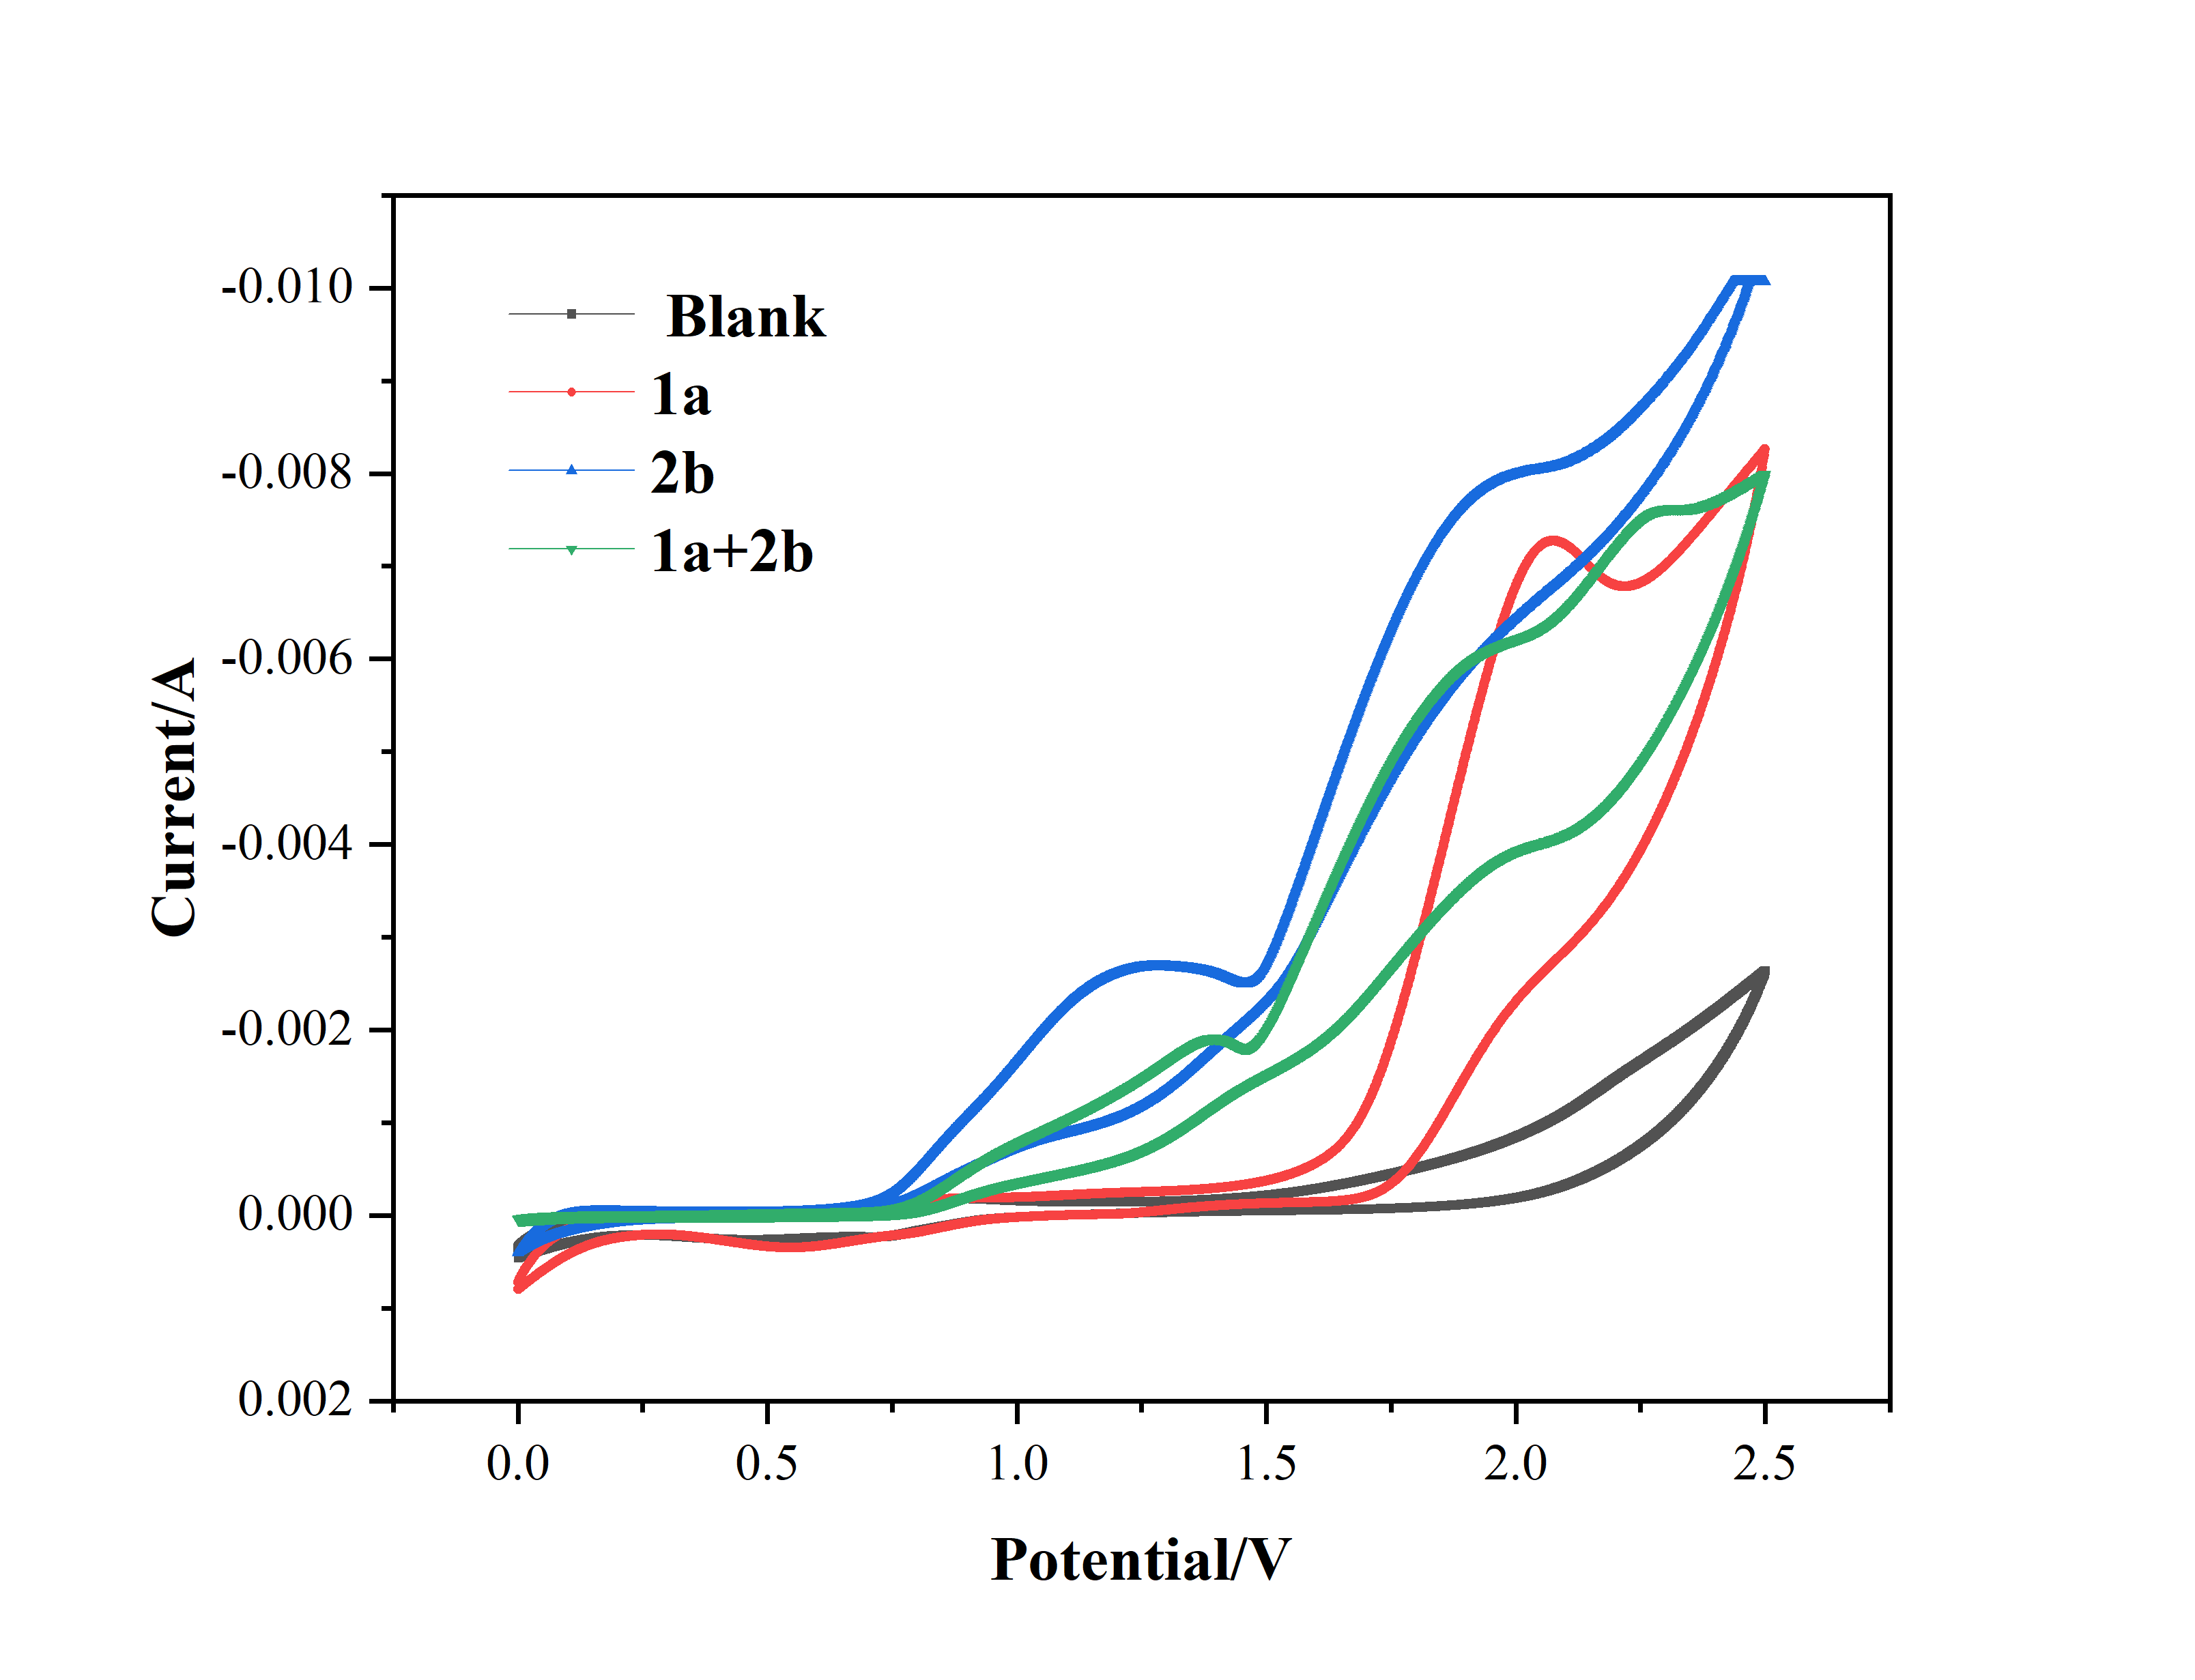


Figure **S2**. The cyclic voltammetry (CV) experiments

# IV Radical trapping experiment

A 25 mL three-necked flask-type cell was charged with *o*-alkynylbenzoate **1a** (0.2 mmol, 1.0 equiv), thiophenols **2b** (0.8 mmol, 4.0 equiv), and Bu4NBF4(0.4 mmol, 2.0 equiv), TEMPO (0.4 mmol, 2.0 equiv). The cell was equipped with a platinum plate (1.0 cm x 1.0 cm x 0.1 mm) anode and a C200 plate (1.2 cm x 1.0 cm x 6.5 mm) cathode. Then a mixture of CH3CN-HFIP (6 mL, v/v=10:1) was added, and the electrolysis was carried out at room temperature using a constant current of 10 mA for 10 hours. Upon completion, the reaction mixture was concentrated and detected by GC-MS (Figure S3).


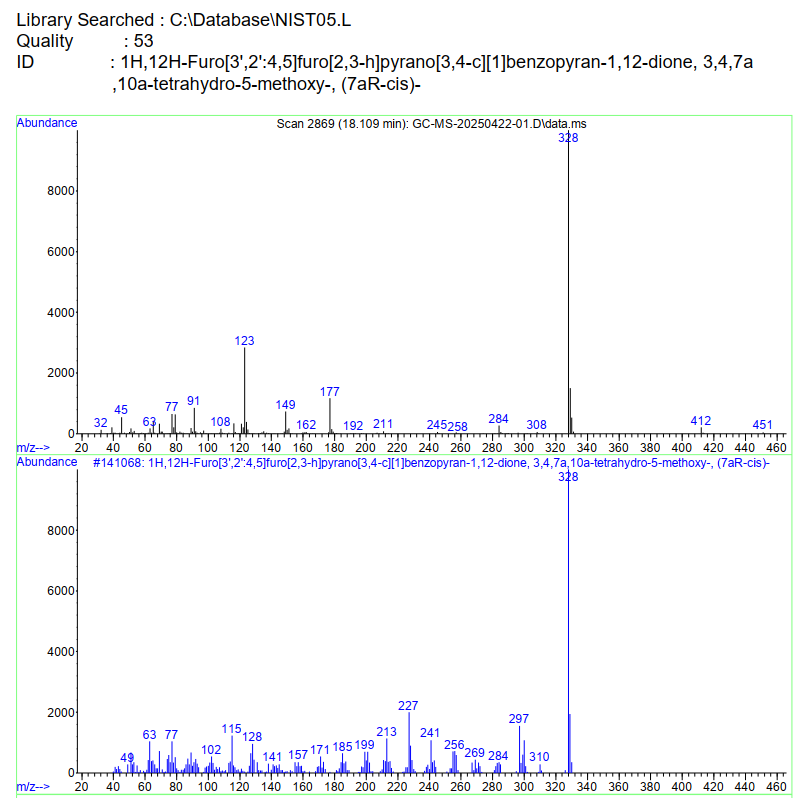


Figure **S3**. GC-MS analysis

# V Gram-scale synthesis and synthetic transformation

**Step 1**: A 100 mL three-necked flask-type cell was charged with **3a** (2 mmol, 1.0 equiv), thiophenols **2** (8 mmol, 4.0 equiv), and Bu4NBF4(4 mmol, 2.0 equiv). The cell was equipped with a platinum plate (1.0 cm x 1.0 cm x 0.2 mm) anode and a C200 plate (1.2 cm x 1.0 cm x 6.5 mm) cathode. Then, a mixture of CH3CN-HFIP (40 mL, v/v=10:1) was added and the electrolysis was carried out at room temperature using a constant current of 10 mA for 10 hours. Upon completion, the reaction mixture was concentrated and purified by silica gel column chromatography using petroleum ether/EA (*v*/*v*=20:1) as the eluent to give the corresponding product **3a** in 59% yield (0.4g).

**Step 2**: A 25 mL dry Schlenk was charged with 3-phenyl-4-(*p*-tolylthio)-1H-isochromen-1-one **3a** (0.5 mmol, 1.0 equiv) and 3-chloroperoxybenzoic acid (0.5 mmol, 1.0 equiv) under an N2 atmosphere. Then, 10 mL of dry DCM was added and stirred at room temperature for overnight. Upon completion, the reaction mixture was concentrated and purified by silica gel column chromatography using petroleum ether/EA (*v*/*v*=5:1 to 3:1) as the eluent to give the corresponding product **4** in 65% yield.

# VI Spectra Data of Products

**3-phenyl-4-(p-tolylthio)-1H-isochromen-1-one (3a)** [S2]

White solid. 1H NMR (500 MHz, Chloroform-*d*) δ 8.28 (dd, *J* = 7.9, 1.4 Hz, 1H), 7.90 (dd, *J* = 7.9, 1.4 Hz, 1H), 7.70 – 7.65 (m, 2H), 7.62 (ddd, *J* = 7.9, 7.2, 1.4 Hz, 1H), 7.48 – 7.42 (m, 1H), 7.40 – 7.27 (m, 3H), 7.00 – 6.90 (m, 4H), 2.19 (s, 3H). 13C NMR (126 MHz, CDCl3) δ 161.53, 159.99, 138.08, 135.71, 135.37, 132.95, 132.86, 130.31, 130.14, 129.79, 129.48, 128.72, 127.97, 126.17, 126.14, 120.91, 106.91, 20.94.

**3-(m-tolyl)-4-(p-tolylthio)-1H-isochromen-1-one (3b)** [S3]

White solid. 1H NMR (500 MHz, Chloroform-*d*) δ 8.28 (dd, *J* = 7.9, 1.4 Hz, 1H), 7.99 – 7.84 (m, 1H), 7.63 (ddd, *J* = 7.9, 7.3, 1.4 Hz, 1H), 7.52 – 7.34 (m, 3H), 7.26 – 7.10 (m, 2H), 7.03 – 6.86 (m, 4H), 2.29 (s, 3H), 2.20 (s, 3H).13C NMR (126 MHz, CDCl3) δ 161.63, 160.22, 138.16, 137.73, 135.65, 135.36, 133.07, 132.74, 131.12, 130.09, 130.02, 129.77, 128.64, 127.77, 126.66, 126.20, 126.13, 120.85, 106.85, 21.45, 20.95.

**3-(p-tolyl)-4-(p-tolylthio)-1H-isochromen-1-one (3c)** [S2]

White solid. 1H NMR (500 MHz, Chloroform-*d*) δ 8.28 (dd, *J* = 7.8, 1.4 Hz, 1H), 7.94 – 7.82 (m, 1H), 7.73 – 7.53 (m, 3H), 7.51 – 7.35 (m, 1H), 7.13 (d, *J* = 7.9 Hz, 2H), 7.00 – 6.79 (m, 4H), 2.31 (s, 3H), 2.20 (s, 3H).13C NMR (126 MHz, CDCl3) δ 161.66, 160.20, 140.68, 138.21, 135.60, 135.33, 133.07, 130.12, 129.97, 129.75, 129.41, 128.69, 128.55, 126.07, 126.05, 120.83, 106.31, 21.55, 20.95.

**3-(4-ethylphenyl)-4-(p-tolylthio)-1H-isochromen-1-one (3d)** [S3]

White solid.1H NMR (500 MHz, Chloroform-*d*) δ 8.28 (dd, *J* = 8.2, 1.4 Hz, 1H), 7.89 (dd, *J* = 8.2, 1.4 Hz, 1H), 7.73 – 7.55 (m, 3H), 7.44 (ddd, *J* = 8.2, 7.4, 1.4 Hz, 1H), 7.16 (d, *J* = 8.2 Hz, 2H), 7.03 – 6.82 (m, 4H), 2.61 (q, *J* = 7.6 Hz, 2H), 2.20 (s, 3H), 1.17 (t, *J* = 7.6 Hz, 3H).13C NMR (126 MHz, CDCl3) δ 161.64, 160.19, 146.86, 138.23, 135.60, 135.33, 133.10, 130.17, 130.11, 129.74, 129.51, 128.54, 127.49, 126.08, 126.06, 120.83, 106.26, 28.81, 20.95, 15.23.

**3-(4-methoxyphenyl)-4-(p-tolylthio)-1H-isochromen-1-one (3e)** [S2]

Pale yellow solid. 1H NMR (400 MHz, Chloroform-*d*) δ 8.37 (ddd, *J* = 7.8, 1.4, 0.6 Hz, 1H), 7.98 (ddd, *J* = 7.8, 1.4, 0.6 Hz, 1H), 7.82 – 7.74 (m, 2H), 7.71 (ddd, *J* = 8.2, 7.3, 1.5 Hz, 1H), 7.53 (ddd, *J* = 8.2, 7.3, 1.4 Hz, 1H), 7.13 – 7.00 (m, 4H), 6.98 – 6.87 (m, 2H), 3.86 (s, 3H), 2.30 (s, 3H).13C NMR (101 MHz, CDCl3) δ 161.66, 161.16, 159.92, 138.43, 135.59, 135.29, 133.12, 131.18, 130.12, 129.71, 128.37, 126.01, 125.99, 125.16, 120.72, 113.36, 105.65, 55.37, 20.91.

**3-(4-fluorophenyl)-4-(p-tolylthio)-1H-isochromen-1-one (3f)** [S3]

Pale yellow solid. 1H NMR (500 MHz, Chloroform-*d*) δ 8.28 (dd, *J* = 8.3, 1.4 Hz, 1H), 7.97 – 7.84 (m, 1H), 7.76 – 7.56 (m, 3H), 7.47 (td, *J* = 7.6, 1.4 Hz, 1H), 7.04 – 6.95 (m, 4H), 6.93 (d, *J* = 8.3 Hz, 2H), 2.20 (s, 3H).13C NMR (126 MHz, Chloroform-*d*) δ 163.74 (d, *J* = 251.1 Hz), 161.38, 158.94, 137.99, 135.85, 135.46, 132.70, 131.68 (d, *J* = 8.4 Hz), 130.22, 129.82, 128.93 (d, *J* = 3.7 Hz), 128.83, 126.14, 126.07, 120.84, 115.15 (d, *J* = 21.8 Hz), 106.91, 20.95.19F NMR (471 MHz, CDCl3) δ -109.23.

**3-(2-fluorophenyl)-4-(p-tolylthio)-1H-isochromen-1-one (3g)** [S3]

Pale yellow solid. 1H NMR (500 MHz, Chloroform-*d*) δ 8.37 (dd, *J* = 7.9, 1.4 Hz, 1H), 7.94 (dd, *J* = 7.9, 1.4 Hz, 1H), 7.71 (ddd, *J* = 7.9, 7.3, 1.4 Hz, 1H), 7.56 (td, *J* = 7.3, 1.4 Hz, 1H), 7.54 – 7.36 (m, 2H), 7.24 – 7.06 (m, 2H), 7.00 (s, 4H), 2.25 (s, 3H).13C NMR (126 MHz, Chloroform-*d*) δ 161.44, 160.03 (d, *J* = 251.0 Hz), 154.96, 137.29, 135.95, 135.35, 132.12, 132.10 (d, *J* = 8.3 Hz), 131.20 (d, *J* = 8.3 Hz), 129.95, 129.08, 126.91, 126.09, 123.86 (d, *J* = 3.6 Hz), 121.50 (d, *J* = 14.6 Hz), 121.23, 116.07, 115.90, 110.68, 20.95.19F NMR (376 MHz, CDCl3) δ -111.12.

**3-(3-fluorophenyl)-4-(p-tolylthio)-1H-isochromen-1-one (3h)** [S3]

White solid. 1H NMR (500 MHz, Chloroform-*d*) δ 8.37 (dd, *J* = 8.3, 1.4 Hz, 1H), 8.08 – 7.92 (m, 1H), 7.73 (td, *J* = 8.3, 7.8, 1.4 Hz, 1H), 7.62 – 7.51 (m, 2H), 7.48 (dt, *J* = 8.4, 2.1 Hz, 1H), 7.37 (td, *J* = 8.4, 5.8 Hz, 1H), 7.15 (td, *J* = 8.4, 2.1 Hz, 1H), 7.07 – 6.98 (m, 4H), 2.28 (s, 3H).13C NMR (126 MHz, Chloroform-*d*) δ 162.08 (d, *J* = 246.4 Hz), 161.22, 158.31, 137.83, 135.95, 135.48, 134.69 (d, *J* = 8.3 Hz), 132.50, 130.22, 129.86, 129.58 (d, *J* = 8.3 Hz), 129.03, 126.27, 126.23, 125.34 (d, *J* = 3.4 Hz), 120.96, 117.30 (d, *J* = 21.1 Hz), 116.65 (d, *J* = 23.7 Hz), 107.76, 20.95.19F NMR (471 MHz, CDCl3) δ -111.60.

**3-(4-chlorophenyl)-4-(p-tolylthio)-1H-isochromen-1-one (3i)** [S3]

White solid.1H NMR (500 MHz, Chloroform-*d*) δ 8.36 (dd, *J* = 7.9, 1.4 Hz, 1H), 7.98 (dd, *J* = 7.9, 1.4 Hz, 1H), 7.80 – 7.65 (m, 3H), 7.55 (td, *J* = 7.9, 1.4 Hz, 1H), 7.43 – 7.34 (m, 2H), 7.14 – 6.90 (m, 4H), 2.28 (s, 3H).13C NMR (126 MHz, CDCl3) δ 161.31, 158.74, 137.89, 136.44, 135.90, 135.49, 132.60, 131.20, 130.85, 130.23, 129.85, 128.94, 128.29, 126.18, 126.06, 120.88, 107.27, 20.95.

**3-(4-bromophenyl)-4-(p-tolylthio)-1H-isochromen-1-one (3j)** [S3]

White solid. 1H NMR (500 MHz, Chloroform-*d*) δ 8.36 (dd, *J* = 8.2, 1.1 Hz, 1H), 7.98 (dd, *J* = 8.2, 1.1 Hz, 1H), 7.77 – 7.67 (m, 1H), 7.66 – 7.60 (m, 2H), 7.59 – 7.50 (m, 3H), 7.11 – 6.92 (m, 4H), 2.28 (s, 3H).13C NMR (126 MHz, CDCl3) δ 161.27, 158.79, 137.89, 135.91, 135.49, 132.59, 131.67, 131.25, 131.04, 130.24, 129.85, 128.95, 126.19, 126.08, 124.87, 120.89, 107.31, 20.95.

**3-(furan-3-yl)-4-(p-tolylthio)-1H-isochromen-1-one (3k)** [S3]

White solid. 1H NMR (400 MHz, Chloroform-*d*) δ 8.36 (dd, *J* = 7.9, 1.4 Hz, 1H), 8.20 (dd, *J* = 7.9, 1.4 Hz, 1H), 8.08 – 8.01 (m, 1H), 7.81 (dd, *J* = 5.2, 1.4 Hz, 1H), 7.72 (ddd, *J* = 8.3, 7.3, 1.4 Hz, 1H), 7.54 (ddd, *J* = 8.3, 7.3, 1.4 Hz, 1H), 7.34 (dd, *J* = 5.2, 3.1 Hz, 1H), 7.08 (s, 4H), 2.30 (s, 3H).13C NMR (101 MHz, CDCl3) δ 161.25, 155.32, 141.94, 138.60, 135.86, 135.35, 133.49, 132.38, 130.25, 129.73, 129.61, 128.48, 126.10, 126.04, 125.11, 120.69, 105.63, 20.91.

**4-((4-methoxyphenyl)thio)-3-phenyl-1H-isochromen-1-one (3l)** [S2]

White solid. 1H NMR (500 MHz, Chloroform-*d*) δ 8.35 (dd, *J* = 7.9, 1.4 Hz, 1H), 8.10 – 8.01 (m, 1H), 7.84 – 7.65 (m, 3H), 7.54 (ddd, *J* = 7.9, 7.2, 1.4 Hz, 1H), 7.46 – 7.40 (m, 3H), 7.06 (d, *J* = 7.9 Hz, 2H), 6.79 – 6.74 (m, 2H), 3.74 (s, 3H).13C NMR (126 MHz, CDCl3) δ 161.55, 159.70, 158.33, 138.12, 135.31, 132.89, 130.28, 129.80, 129.62, 128.68, 128.43, 127.97, 126.88, 126.15, 120.95, 115.04, 107.95, 55.35.

**4-((4-methoxyphenyl)thio)-3-(o-tolyl)-1H-isochromen-1-one (3m)** [S3]

White solid. 1H NMR (400 MHz, Chloroform-*d*) δ 8.39 (dd, *J* = 8.0, 1.3 Hz, 1H), 8.09 (dt, *J* = 8.1, 1.0 Hz, 1H), 7.78 (ddd, *J* = 8.3, 7.3, 1.4 Hz, 1H), 7.59 (ddd, *J* = 8.3, 7.4, 1.2 Hz, 1H), 7.43 – 7.33 (m, 2H), 7.35 – 7.19 (m, 2H), 7.04 – 6.97 (m, 2H), 6.85 – 6.69 (m, 2H), 3.75 (s, 3H), 2.30 (s, 3H).13C NMR (101 MHz, CDCl3) δ 161.66, 160.29, 158.52, 137.88, 137.17, 135.28, 132.96, 130.27, 129.98, 129.92, 129.86, 129.60, 128.74, 126.37, 125.96, 125.39, 121.08, 114.79, 110.33, 55.33, 19.80.

**3-([1,1'-biphenyl]-4-yl)-4-((4-methoxyphenyl)thio)-1H-isochromen-1-one (3n)** [S3]

White solid. 1H NMR (500 MHz, Chloroform-*d*) δ 8.29 (dd, *J* = 8.2, 1.2 Hz, 1H), 7.97 (dd, *J* = 8.2, 1.2 Hz, 1H), 7.82 – 7.77 (m, 2H), 7.65 (ddd, *J* = 8.2, 7.3, 1.2 Hz, 1H), 7.60 – 7.53 (m, 4H), 7.46 (td, *J* = 7.6, 1.2 Hz, 1H), 7.38 (t, *J* = 7.6 Hz, 2H), 7.33 – 7.27 (m, 1H), 7.05 – 6.99 (m, 2H), 6.74 – 6.68 (m, 2H), 3.66 (s, 3H).13C NMR (126 MHz, CDCl3) δ 161.52, 159.42, 158.36, 142.99, 140.16, 138.19, 135.32, 131.69, 130.12, 129.81, 128.92, 128.67, 128.35, 127.91, 127.21, 126.91, 126.61, 126.17, 120.95, 115.11, 107.85, 55.36.

**4-((4-methoxyphenyl)thio)-3-(4-(trifluoromethyl)phenyl)-1H-isochromen-1-one (3o)** [S3]

White solid. 1H NMR (500 MHz, Chloroform-*d*) δ 8.29 (dd, *J* = 8.3, 1.2 Hz, 1H), 7.99 (dd, *J* = 8.3, 1.2 Hz, 1H), 7.81 (d, *J* = 8.3 Hz, 2H), 7.68 (ddd, *J* = 8.3, 7.2, 1.2 Hz, 1H), 7.61 (d, *J* = 8.3 Hz, 2H), 7.50 (td, *J* = 7.2, 1.2 Hz, 1H), 6.99 – 6.93 (m, 2H), 6.73 – 6.67 (m, 2H), 3.67 (s, 3H). 13C NMR (126 MHz, Chloroform-*d*) δ 161.08, 158.54, 157.88, 137.71, 136.26, 135.48, 132.01, 131.75, 130.04, 129.92, 129.18, 128.47, 126.30, 124.97 (q, *J* = 3.7 Hz), 122.70, 121.07, 115.19, 109.29, 55.36.19F NMR (471 MHz, CDCl3) δ -62.86.

**4-((4-methoxyphenyl)thio)-6-methyl-3-phenyl-1H-isochromen-1-one (3p)** [S2]

White solid. 1H NMR (400 MHz, Chloroform-*d*) δ 8.26 (d, *J* = 8.0 Hz, 1H), 7.87 (dt, *J* = 1.6, 0.7 Hz, 1H), 7.80 – 7.73 (m, 2H), 7.51 – 7.40 (m, 3H), 7.37 (ddd, *J* = 8.0, 1.6, 0.7 Hz, 1H), 7.15 – 7.02 (m, 2H), 6.89 – 6.69 (m, 2H), 3.77 (s, 3H), 2.46 (s, 3H).13C NMR (101 MHz, CDCl3) δ 161.57, 159.85, 158.30, 146.52, 138.20, 133.06, 130.15, 130.03, 129.84, 129.60, 128.44, 127.91, 127.12, 126.10, 118.50, 115.02, 107.91, 55.33, 22.35.

**6-fluoro-4-((4-methoxyphenyl)thio)-3-phenyl-1H-isochromen-1-one (3q)** [S3]

White solid. 1H NMR (500 MHz, Chloroform-*d*) δ 8.29 (dd, *J* = 8.3, 5.6 Hz, 1H), 7.69 (dt, *J* = 5.6, 2.5 Hz, 2H), 7.63 (dd, *J* = 10.1, 2.5 Hz, 1H), 7.51 – 7.29 (m, 3H), 7.14 (td, *J* = 8.3, 2.5 Hz, 1H), 7.01 – 6.94 (m, 2H), 6.77 – 6.67 (m, 2H), 3.67 (s, 3H). 13C NMR (126 MHz, Chloroform-*d*) δ 167.26 (d, *J* = 256.5 Hz), 160.94, 160.58, 158.57, 141.57 (d, *J* = 10.7 Hz), 133.19 (d, *J* = 10.1 Hz), 132.59, 130.54, 129.64, 128.70, 128.03, 126.13, 117.36, 116.99 (d, *J* = 23.7 Hz), 112.44, 112.24, 107.62 (d, *J* = 2.8 Hz), 55.36.19F NMR (471 MHz, CDCl3) δ -99.97.

**6-chloro-4-((4-methoxyphenyl)thio)-3-phenyl-1H-isochromen-1-one (3r)** [S2]

White solid. 1H NMR (400 MHz, Chloroform-*d*) δ 8.29 (d, *J* = 8.4 Hz, 1H), 8.08 (d, *J* = 8.4 Hz, 1H), 7.81 – 7.74 (m, 2H), 7.54 – 7.39 (m, 4H), 7.12 – 7.03 (m, 2H), 6.84 – 6.76 (m, 2H), 3.77 (s, 3H).13C NMR (101 MHz, CDCl3) δ 160.89, 160.73, 158.61, 142.36, 139.91, 132.58, 131.46, 130.53, 129.66, 129.19, 128.86, 128.02, 126.16, 125.91, 119.23, 115.17, 107.48, 55.36.

**7-methoxy-4-((4-methoxyphenyl)thio)-3-phenyl-1H-isochromen-1-one (3s)** [S3]

White solid. 1H NMR (500 MHz, Chloroform-*d*) δ 7.87 (d, *J* = 8.9 Hz, 1H), 7.68 (td, *J* = 5.4, 2.7 Hz, 3H), 7.34 (tdd, *J* = 8.9, 5.4, 2.7 Hz, 3H), 7.21 (dd, *J* = 8.9, 2.7 Hz, 1H), 7.02 – 6.93 (m, 2H), 6.75 – 6.63 (m, 2H), 3.84 (s, 3H), 3.66 (s, 3H).13C NMR (126 MHz, CDCl3) δ 161.73, 159.86, 158.29, 157.59, 132.87, 131.69, 130.04, 129.60, 128.35, 127.96, 127.94, 127.00, 124.71, 122.13, 115.03, 110.26, 107.73, 55.87, 55.34.

**7-chloro-4-((4-methoxyphenyl)thio)-3-phenyl-1H-isochromen-1-one (3t)** [S2]

White solid. 1H NMR (500 MHz, Chloroform-*d*) δ 8.25 – 8.22 (m, 1H), 7.90 (d, *J* = 8.3 Hz, 1H), 7.68 (d, *J* = 8.3 Hz, 2H), 7.60 – 7.55 (m, 1H), 7.41 – 7.34 (m, 3H), 6.97 (d, *J* = 8.3 Hz, 2H), 6.70 (d, *J* = 8.3 Hz, 2H), 3.67 (s, 3H).13C NMR (126 MHz, CDCl3) δ 160.40, 159.78, 158.51, 136.65, 135.56, 134.68, 132.51, 130.48, 129.63, 129.14, 128.58, 128.02, 127.97, 126.35, 122.16, 115.14, 107.60, 55.36.

**4-((4-methoxyphenyl)thio)-3-(****trimethylsilyl)-1H-isochromen-1-one (3u)** [S2]

Pale yellow oil. 1H NMR (400 MHz, Chloroform-*d*) δ 8.32 (dd, *J* = 8.0, 1.4 Hz, 1H), 7.74 (dd, *J* = 8.0, 1.4 Hz, 1H), 7.65 (ddd, *J* = 8.0, 7.3, 1.4 Hz, 1H), 7.52 (td, *J* = 7.3, 1.4 Hz, 1H), 7.12 – 7.03 (m, 2H), 6.85 – 6.77 (m, 2H), 3.77 (s, 3H), 0.43 (s, 9H).13C NMR (101 MHz, CDCl3) δ 170.17, 162.84, 158.15, 136.53, 134.86, 129.59, 129.05, 127.61, 126.78, 125.08, 121.98, 119.43, 114.97, 55.32, -0.71.

**4-((4-(tert-butyl)phenyl)thio)-3-phenyl-1H-isochromen-1-one (3v)** [S4]

White solid. 1H NMR (400 MHz, Chloroform-*d*) δ 8.40 (dd, *J* = 8.0, 1.5 Hz, 1H), 8.06 – 8.00 (m, 1H), 7.81 – 7.70 (m, 3H), 7.57 (ddd, *J* = 8.0, 7.3, 1.5 Hz, 1H), 7.53 – 7.39 (m, 3H), 7.31 – 7.24 (m, 2H), 7.12 – 7.04 (m, 2H), 1.29 (s, 9H). 13C NMR (101 MHz, CDCl3) δ 161.57, 159.99, 148.95, 138.14, 135.41, 132.90, 132.84, 130.30, 129.78, 129.55, 128.72, 127.96, 126.42, 126.25, 125.88, 120.87, 106.90, 34.43, 31.26.

**4-((4-isopropylphenyl)thio)-3-phenyl-1H-isochromen-1-one (3w)** [S4]

White solid. 1H NMR (500 MHz, Chloroform-*d*) δ 8.28 (dd, *J* = 8.0, 1.4 Hz, 1H), 7.92 (dd, *J* = 8.0, 1.4 Hz, 1H), 7.70 – 7.66 (m, 2H), 7.63 (ddd, *J* = 8.0, 7.3, 1.4 Hz, 1H), 7.49 – 7.42 (m, 1H), 7.39 – 7.29 (m, 3H), 7.11 – 6.89 (m, 4H), 2.75 (p, *J* = 6.9 Hz, 1H), 1.11 (d, *J* = 6.9 Hz, 6H).13C NMR (126 MHz, CDCl3) δ 161.53, 159.98, 146.69, 138.14, 135.37, 133.18, 132.87, 130.28, 129.77, 129.54, 128.70, 127.96, 127.52, 126.22, 120.90, 107.00, 33.57, 23.88.

**4-((2-methoxyphenyl)thio)-3-phenyl-1H-isochromen-1-one (3x)** [S3]

White solid. 1H NMR (500 MHz, Chloroform-*d*) δ 8.30 (dd, *J* = 8.0, 1.4 Hz, 1H), 7.84 (dd, *J* = 8.0, 1.4 Hz, 1H), 7.69 – 7.57 (m, 3H), 7.51 – 7.42 (m, 1H), 7.32 (dddd, *J* = 14.7, 8.7, 6.3, 2.1 Hz, 3H), 7.06 (ddd, *J* = 8.7, 6.3, 2.1 Hz, 1H), 6.86 – 6.78 (m, 1H), 6.76 – 6.62 (m, 2H), 3.84 (s, 3H).13C NMR (126 MHz, CDCl3) δ 161.56, 160.23, 155.60, 138.03, 135.35, 132.82, 130.28, 129.76, 129.34, 128.72, 127.97, 126.45, 126.12, 125.96, 125.09, 121.55, 120.88, 110.60, 105.59, 55.90.

**4-((4-fluorophenyl)thio)-3-phenyl-1H-isochromen-1-one (3y)** [S4]

White solid. 1H NMR (500 MHz, Chloroform-*d*) δ 8.30 (dd, *J* = 7.9, 1.4 Hz, 1H), 7.89 (dd, *J* = 8.1, 1.1 Hz, 1H), 7.66 (ddd, *J* = 8.4, 7.1, 1.6 Hz, 3H), 7.36 (dddd, *J* = 14.5, 8.6, 6.1, 2.1 Hz, 3H), 7.08 – 6.99 (m, 2H), 6.90 – 6.82 (m, 2H).13C NMR (126 MHz, Chloroform-*d*) δ 161.35 (d, *J* = 246.2 Hz), 161.33, 160.20, 137.79, 135.42, 132.71, 131.45 (d, *J* = 3.6 Hz), 130.43, 129.94, 129.49, 128.86, 128.13 (d, *J* = 8.2 Hz), 128.03, 125.91, 120.95, 116.53 (d, *J* = 22.1 Hz), 107.08. 19F NMR (471 MHz, CDCl3) δ -116.19.

**4-((4-chlorophenyl)thio)-3-phenyl-1H-isochromen-1-one (3z)** [S4]

White solid. 1H NMR (400 MHz, Chloroform-*d*) δ 8.40 (dt, *J* = 7.8, 0.9 Hz, 1H), 7.94 (dt, *J* = 7.8, 0.9 Hz, 1H), 7.83 – 7.67 (m, 3H), 7.59 (ddd, *J* = 8.3, 7.8, 0.9 Hz, 1H), 7.55 – 7.32 (m, 3H), 7.26 – 7.18 (m, 2H), 7.11 – 7.03 (m, 2H). 13C NMR (101 MHz, CDCl3) δ 161.26, 160.47, 137.64, 135.49, 135.13, 132.63, 131.72, 130.50, 129.97, 129.49, 129.37, 128.93, 128.05, 127.26, 125.82, 120.91, 106.21.

**4-((4-bromophenyl)thio)-3-phenyl-1H-isochromen-1-one (3aa)** [S4]

White solid. 1H NMR (400 MHz, Chloroform-*d*) δ 8.40 (dd, *J* = 8.3, 1.2 Hz, 1H), 7.97 – 7.90 (m, 1H), 7.79 – 7.72 (m, 3H), 7.59 (ddd, *J* = 8.3, 7.3, 1.2 Hz, 1H), 7.52 – 7.41 (m, 3H), 7.39 – 7.34 (m, 2H), 7.05 – 6.97 (m, 2H).13C NMR (101 MHz, CDCl3) δ 161.25, 160.52, 137.59, 135.86, 135.52, 132.62, 132.39, 130.52, 129.98, 129.36, 128.96, 128.07, 127.49, 125.81, 120.90, 119.47, 105.99.

**3-phenyl-4-(p-tolylsulfinyl)-1H-isochromen-1-one (4)** [S4]

White solid. 1H NMR (400 MHz, Chloroform-*d*) δ 8.33 (d, *J* = 8.0 Hz, 1H), 8.15 (d, *J* = 8.0 Hz, 1H), 7.79 (dd, *J* = 8.0, 1.6 Hz, 2H), 7.63 – 7.46 (m, 7H), 7.29 (d, *J* = 8.0, 2H), 2.38 (s, 3H). 13C NMR (101 MHz, CDCl3) δ 160.53, 160.15, 140.91, 139.72, 134.97, 132.95, 131.41, 130.82, 130.21, 130.01, 129.14, 128.60, 125.19, 124.78, 121.15, 117.85, 21.29.

# VII References

[S1] T. Yao, R. C. Larock, *J. Org. Chem.* **2003**, *68*, 5936-5942.

[S2] A. B. Dapkekar, G. Satyanarayana, *Org. Biomol. Chem*. **2024**, *22*, 7111-7116.

[S3] .Z. Li, J. Hong, L. Weng, X. Zhou, *Tetrahedron* **2012**, *68*, 1552-1559.

[S4] A. Saha, E. Ramesh, A. K. Sahoo, *Adv. Synth. Catal*. **2022**, *364*, 3496-3500.

# VIII The 1H-, 13C{1H}-, 19F{1H} Spectra of Products

1H Spectra of **3a**

13C{1H} Spectra of **3a**

1H Spectra of **3b**

13C{1H} Spectra of **3b**

1H Spectra of **3c**

13C{1H} Spectra of **3c**

1H Spectra of **3d**

13C{1H} Spectra of **3d**

1H Spectra of **3e**

13C{1H} Spectra of **3e**

1H Spectra of **3f**

13C{1H} Spectra of **3f**

19F{1H} Spectra of **3f**

1H Spectra of **3g**

13C{1H} Spectra of **3g**

19F{1H} Spectra of **3g**

1H Spectra of **3h**

13C{1H} Spectra of **3h**

19F{1H} Spectra of **3h**

1H Spectra of **3i**

13C{1H} Spectra of **3i**

1H Spectra of **3j**

13C{1H} Spectra of **3j**

1H Spectra of **3k**

13C{1H} Spectra of **3k**

1H Spectra of **3l**

13C{1H} Spectra of **3l**

1H Spectra of **3m**

13C{1H} Spectra of **3m**

1H Spectra of **3n**

13C{1H} Spectra of **3n**

1H Spectra of **3o**

13C{1H} Spectra of **3o**

19F{1H} Spectra of **3o**

1H Spectra of **3p**

13C{1H} Spectra of **3p**

1H Spectra of **3q**

13C{1H} Spectra of **3q**

19F{1H} Spectra of **3q**

1H Spectra of **3r**

13C{1H} Spectra of **3r**

1H Spectra of **3s**

13C{1H} Spectra of **3s**

1H Spectra of **3t**

13C{1H} Spectra of **3t**

1H Spectra of **3u**

13C{1H} Spectra of **3u**

1H Spectra of **3v**

13C{1H} Spectra of **3v**

1H Spectra of **3w**

13C{1H} Spectra of **3w**

1H Spectra of **3x**

13C{1H} Spectra of **3x**

1H Spectra of **3y**

13C{1H} Spectra of **3y**

19F{1H} Spectra of **3y**

1H Spectra of **3z**

13C{1H} Spectra of **3z**

1H Spectra of **3aa**

13C{1H} Spectra of **3aa**

1H Spectra of **4**

13C{1H} Spectra of **4**
